# Supplementary material for: Water isotopic characterisation of the cloud–circulation coupling in the North Atlantic trades – Part 1: A process-oriented evaluation of COSMO iso simulations with EUREC 4 A observations
Source: Copernicus journal article supplement (doi:10.5194/acp-23-14643-2023), 2023-11-29
Supplement: Supplementary file 5 [file acp-23-14643-2023-supplement.zip]

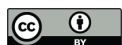

*Supplement of*

**Water isotopic characterisation of the cloud–circulation coupling in the North Atlantic trades – Part 1: A process-oriented evaluation of COSMO<sub>iso</sub> simulations with EUREC<sup>4</sup>A observations**

**Leonie Villiger et al.**

*Correspondence to:* Leonie Villiger (leonie.villiger@env.ethz.ch)

- acp-23-14643-2023-supplement-title-page.pdf
- acp\_part1\_supplement1.pdf
- acp\_part1\_supplement2.pdf
- acp\_part1\_supplement3.pdf
- acp\_part1\_supplement4.pdf

The copyright of individual parts of the supplement might differ from the article licence.
